# Supplementary material
Source: publisher site journal article supplement (https://www.dovepress.com/article/394481)
Supplement: Supplementary file 1 [file get_supplementary_file.php]

**Appendix 1**

**Study Skills Inventory (SSI)**

|  | **Reading text** | Always | Usually | Rarely | Never |
| --- | --- | --- | --- | --- | --- |
|  | I try to organize facts in a systematic way. |  |  |  |  |
|  | I look for the main ideas as I read. |  |  |  |  |
|  | I take notes as I read my textbooks. |  |  |  |  |
|  | When reading, I highlight important passages. |  |  |  |  |
|  |  |  |  |  |  |
|  | **Concentration and memory** | Always | Usually | Rarely | Never |
|  | I study even when less important things distract me |  |  |  |  |
|  | I give full attention to the tasks. |  |  |  |  |
|  | I keep up with assignments, readings and tests preparations, avoiding any delays |  |  |  |  |
|  | I keep study time a priority, saying “no” to social demands and extracurricular events |  |  |  |  |
|  | I avoid activities, which tend to interfere with my planned schedule. |  |  |  |  |
|  | **Time management** | Always | Usually | Rarely | Never |
|  | At the beginning of the term, I make up my activity and study schedules |  |  |  |  |
|  | I break assignments into manageable parts. |  |  |  |  |
|  | I use a “to do” list to keep track of the tasks. |  |  |  |  |
|  | I plan my day by deciding what is important to do |  |  |  |  |
|  | I outline specific goals for my study time. |  |  |  |  |
|  | **Emotional management** | Always | Usually | Rarely | Never |
|  | I plan regular times for fun. |  |  |  |  |
|  | I take relaxation or rest time when under stress. |  |  |  |  |
|  | I regularly try to motivate myself to keep up with the planned schedule |  |  |  |  |
|  | I try to get rid of negative thoughts and worrying while studying |  |  |  |  |
|  | **Other learning practices** | Always | Usually | Rarely | Never |
|  | When I do not understand something, I get help from classmates |  |  |  |  |
|  | I participate in class discussions. |  |  |  |  |
|  | I volunteer answers to questions posed by instructors in the class. |  |  |  |  |
|  | I see learning as something I will be doing all throughout my life. |  |  |  |  |
|  | I ask the instructor questions when clarification is needed. |  |  |  |  |

**Kessler psychological distress scale (K10)**

**These question are about you have been feeling for the last 30 days. Tick a box below that best represents how you have been.**

|  | Please tick the answer that is correct for you: | All of the time (score 5) | Most of the time (score 4) | Some of the time (score 3) | A little of the time (score 2) | None of the time (score 1) |
| --- | --- | --- | --- | --- | --- | --- |
| 1 | In the past 4 weeks, about how often did you feel tired out for no good reason? |  |  |  |  |  |
| 2 | In the past 4 weeks, about how often did you feel nervous? |  |  |  |  |  |
| 3 | In the past 4 weeks, about how often did you feel so nervous that nothing could calm you down? |  |  |  |  |  |
| 4 | In the past 4 weeks, about how often did you feel hopeless? |  |  |  |  |  |
| 5 | In the past 4 weeks, about how often did you feel restless or fidgety? |  |  |  |  |  |
| 6 | In the past 4 weeks, about how often did you feel so restless you could not sit still? |  |  |  |  |  |
| 7 | In the past 4 weeks, about how often did you feel depressed? |  |  |  |  |  |
| 8 | In the past 4 weeks, about how often did you feel that everything was an effort? |  |  |  |  |  |
| 9 | In the past 4 weeks, about how often did you feel so sad that nothing could cheer you up? |  |  |  |  |  |
| 10 | In the past 4 weeks, about how often did you feel worthless? |  |  |  |  |  |
